# Supplementary material for: Prediction of metastable phase of the Sc–N system in the N-rich region under high pressure
Source: Royal Society of Chemistry journal article supplement (doi:10.1039/d3cp00826f), 2023-01-01
Supplement: d3cp00826f1.pdf [file d3cp00826f1.pdf]

## Supporting Information

### **Prediction of Metastable Phase of the Sc-N System in the N-rich Region under High Pressure**

Shifeng Niu<sup>1,2</sup>, Yuanyuan Liu<sup>2</sup>, Zhenxing Yang<sup>3</sup>, Shijie Liu<sup>1\*</sup> and Zhen  
Yao<sup>2\*</sup>

1 School of Physics and Engineering, Institute of Materials Science and  
Engineering, Henan University of Science and Technology, Luoyang,  
471023, P.R. China;

2 State Key Laboratory of Superhard Materials, College of Physics, Jilin  
University, Changchun, 130012, P.R. China;

3 College of Sciences, Hebei North University, Zhangjiakou, 075000, P.R.  
China.

---

\* Email: liusj0228@163.com

\* Email: yaozhen@jlu.edu.cn

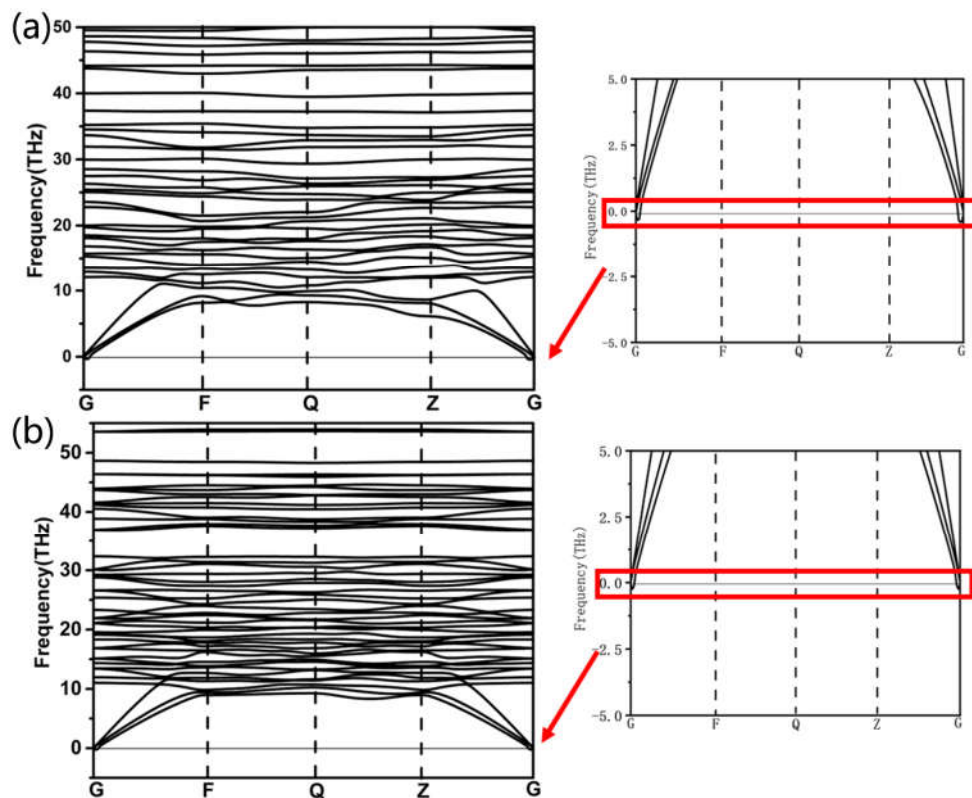

**Fig.S1.** The phonon dispersion curves of ScN<sub>10</sub> (a) and ScN<sub>14</sub> (b) at 200 GPa.

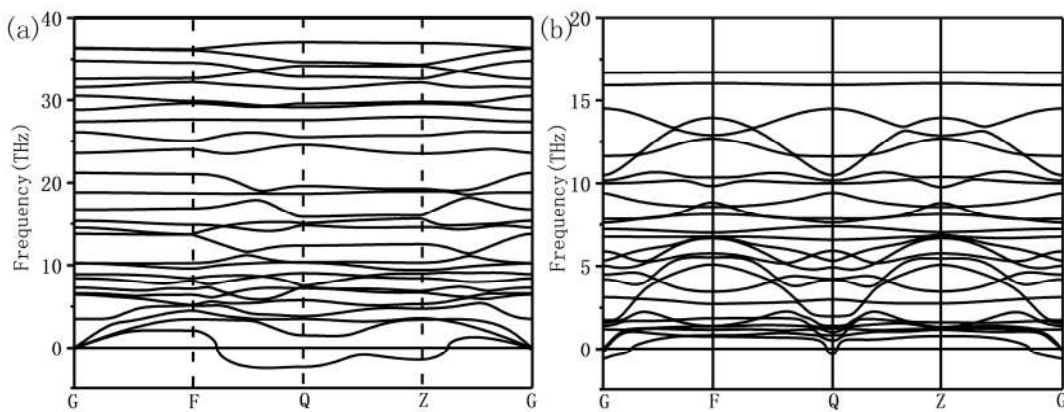

**Fig.S2.** The phonon dispersion curves of P1-ScN<sub>8</sub> (a) and P1-ScN<sub>9</sub> (b) at 0 GPa.

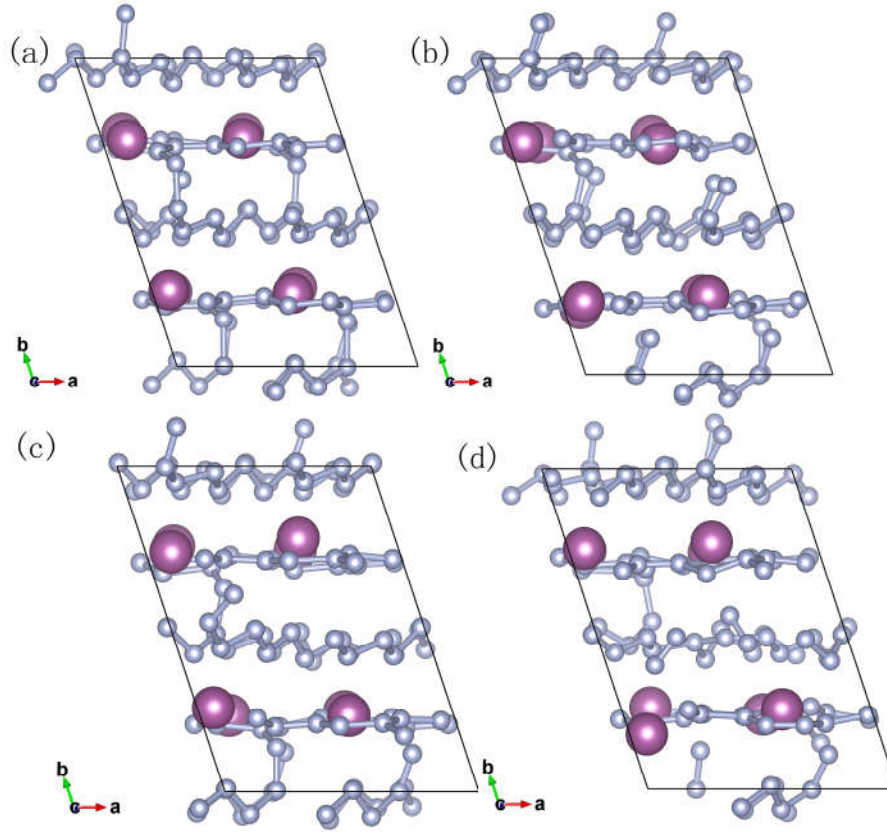

**Fig.S3.** Images of P1-ScN<sub>11</sub> after the FPMD simulation: 300 K (a), 600 K (b) and 800 K at 3 ps (c), 10 ps (d) at 0 GPa.

**Table S1.** The lattice constants and position coordinate of the Sc-N system.

| Structure                     | Pressure (GPa) | Lattice Parameters (Å, °)                                                                                                  | Atomic Positions                                                                                                                                                                                                                               |
|-------------------------------|----------------|----------------------------------------------------------------------------------------------------------------------------|------------------------------------------------------------------------------------------------------------------------------------------------------------------------------------------------------------------------------------------------|
| P $\bar{1}$ -ScN <sub>8</sub> | 200            | $a = 2.6795$<br>$b = 4.1986$<br>$c = 4.3265$<br>$\alpha = 73.02^\circ$<br>$\beta = 92.70^\circ$<br>$\gamma = 100.62^\circ$ | Sc <sub>1</sub> (1g) (0.0000, 0.5000, 0.5000)<br>N <sub>1</sub> (2i) (0.1254, 0.0598, 0.8580)<br>N <sub>2</sub> (2i) (0.5187, 0.6863, 0.1270)<br>N <sub>3</sub> (2i) (0.5534, -0.1450, 0.5841)<br>N <sub>4</sub> (2i) (0.2727, 0.7686, 0.8496) |

|                      |     |                                                                                                                             |                                                                                                                                                                                                                                                                                                                                                                                                                                                                                                                                                                                                  |
|----------------------|-----|-----------------------------------------------------------------------------------------------------------------------------|--------------------------------------------------------------------------------------------------------------------------------------------------------------------------------------------------------------------------------------------------------------------------------------------------------------------------------------------------------------------------------------------------------------------------------------------------------------------------------------------------------------------------------------------------------------------------------------------------|
| P1-ScN <sub>9</sub>  | 200 | $a = 3.4118$<br>$b = 4.2794$<br>$c = 4.2924$<br>$\alpha = 116.05^\circ$<br>$\beta = 106.33^\circ$<br>$\gamma = 98.79^\circ$ | Sc <sub>1</sub> (1a) (0.2809, 0.0731, 0.6178)<br>N <sub>1</sub> (1a) (0.0469, 0.4712, 0.2403)<br>N <sub>2</sub> (1a) (0.8898, 0.1535, 0.9351)<br>N <sub>3</sub> (1a) (0.6447, 0.8168, 0.3480)<br>N <sub>4</sub> (1a) (0.5555, 0.2933, 0.3834)<br>N <sub>5</sub> (1a) (0.9588, 0.3948, 0.5089)<br>N <sub>6</sub> (1a) (0.9503, 0.8857, 0.0207)<br>N <sub>7</sub> (1a) (0.5537, 0.6591, 0.9843)<br>N <sub>8</sub> (1a) (0.1810, 0.7211, 0.8306)<br>N <sub>9</sub> (1a) (0.1810, 0.7211, 0.8306)                                                                                                    |
| P1-ScN <sub>11</sub> | 200 | $a = 3.4893$<br>$b = 4.3073$<br>$c = 4.5362$<br>$\alpha = 102.29^\circ$<br>$\beta = 99.94^\circ$<br>$\gamma = 107.61^\circ$ | Sc <sub>1</sub> (1a) (0.1682, 0.5279, 0.5496)<br>N <sub>1</sub> (1a) (0.4410, 0.9184, 0.9413)<br>N <sub>2</sub> (1a) (0.4336, 0.4504, 0.1399)<br>N <sub>3</sub> (1a) (0.7872, 0.8398, 0.6362)<br>N <sub>4</sub> (1a) (0.5052, 0.3746, 0.8598)<br>N <sub>5</sub> (1a) (0.0934, 0.8342, 0.2917)<br>N <sub>6</sub> (1a) (0.0264, 0.3127, 0.0735)<br>N <sub>7</sub> (1a) (0.5661, 0.3247, 0.3601)<br>N <sub>8</sub> (1a) (-0.0059, 0.0241, 0.4906)<br>N <sub>9</sub> (1a) (0.8230, 0.9725, 0.9272)<br>N <sub>10</sub> (1a) (0.8737, 0.4395, 0.8642)<br>N <sub>11</sub> (1a) (0.4295, 0.9932, 0.2276) |
